# Supplementary material
Source: PubMed Central journal article supplement (PMC170959)
Supplement: pnas_1133381100_1.pdf [file pnas_1133381100_1.pdf]

## **Supporting Text**

**Water Maze Testing.** The water maze pool (diameter, 122 cm) contained opaque water (24°C) with a platform (diameter, 10 cm) submerged 2 cm below the water surface. For cued training sessions, the platform was raised to the level of the water surface and flagged with a white pen with a red cap mounted on the platform. Mice were trained to locate the visible platform (sessions 1–4) and then the hidden platform (sessions 5-10) in two daily sessions (3.5 h apart), each consisting of three 60-s trials (15-min intertrial interval). Platform location was changed for each visible platform session but remained constant in hidden platform sessions. Entry points were changed semirandomly between trials. One hour after completion of the hidden platform training, a 60-s probe trial was performed. Entry points for probe trials were in the quadrant opposite the target quadrant. Performance was monitored with an EthoVision video-tracking system (Noldus Information Technology, Wageningen, The Netherlands).
